# Supplementary material for: The Lasting Influences of Early Food-Related Variety Experience: A Longitudinal Study of Vegetable Acceptance from 5 Months to 6 Years in Two Populations
Source: PubMed Central journal article supplement (PMC4788196; doi:10.1371/journal.pone.0151356), 2016-03-11
Supplement: pone.0151356.s002.pdf [file pone.0151356.s002.pdf]

**S1 Table. Chi-2 values for the comparisons of the Dijon and Aalen samples of children participating at each follow-up with the initial sample of children in terms of frequency for each type of milk feeding and in terms of each type of variety experience.**

| Region | Frequency compared        | Follow-up 1 | Follow-up 2 | Follow-up 3 |
|--------|---------------------------|-------------|-------------|-------------|
| Dijon  | Breast- vs. formula-feed  | 0.00        | 0.97        | 0.68        |
|        | No vs low vs high variety | 0.09        | 0.98        | 1.44        |
| Aalen  | Breast- vs. formula-feed  | 0.16        | 0.05        | 0.79        |
|        | No vs low vs high variety | 0.02        | 0.24        | 0.48        |

All values were NS
